# Supplementary material for: Integrated model of primary and mental healthcare for the refugee population served by an academic medical centre
Source: HighWire-hosted journal article supplement (doi:10.1136/fmch-2022-002038), 2023-04-01
Supplement: fmch-2022-002038supp001_data_supplement.pdf [file fmch-2022-002038supp001_data_supplement.pdf]

**An Integrated Model of Primary and Mental Health Care for the Refugee Population  
Served by an Academic Medical Center:  
Online Supplement**

**Table S1**

Demographic Characteristics of 111 IFMC Patients Seen in Family Medicine with a Mental Health Diagnosis Listed by their Primary Care Physician

|                                                                       | <b>Follow-Up with<br/>MH Providers</b> | <b>No Follow-Up with<br/>MH Providers</b> |
|-----------------------------------------------------------------------|----------------------------------------|-------------------------------------------|
| Number of Patients                                                    | 82                                     | 29                                        |
| Average Age in Years (SD)                                             | 37.28 (13.82)                          | 41.97 (19.79)                             |
| <i>Sex</i>                                                            |                                        |                                           |
| Female                                                                | 58 (70.73%)                            | 23 (79.31%)                               |
| Male                                                                  | 24 (29.27%)                            | 6 (20.69%)                                |
| <i>Country/Region of Origin</i>                                       |                                        |                                           |
| Afghanistan                                                           | 42                                     | 13                                        |
| Other Countries in Central and Southern Asia                          | 15                                     | 7                                         |
| Countries in Eastern and South-Eastern Asia                           | <5                                     | 0                                         |
| Countries in Sub-Saharan Africa, Northern<br>Africa, and Western Asia | 13                                     | 7                                         |
| Unknown                                                               | 9                                      | 2                                         |
| <i>Country/Region of Exit</i>                                         |                                        |                                           |
| Afghanistan                                                           | 28                                     | 8                                         |
| Other Countries in Central and Southern Asia                          | 15                                     | <5                                        |
| Countries in Eastern and South-Eastern Asia                           | <5                                     | <5                                        |
| Countries in Sub-Saharan Africa, Northern<br>Africa, and Western Asia | 20                                     | 7                                         |
| Eastern Europe                                                        | <5                                     | <5                                        |
| Unknown                                                               | 12                                     | 7                                         |
| <i>Legal Status</i>                                                   |                                        |                                           |
| Refugee                                                               | 57                                     | 21                                        |
| Special Immigrant Visa                                                | 21                                     | 5                                         |
| Not Provided                                                          | 4                                      | 3                                         |
| <i>Primary Diagnosis Indicated by FM Referral</i>                     |                                        |                                           |
| Anxiety                                                               | 20 (24.39%)                            | 10 (34.48%)                               |
| Depression                                                            | 43 (52.44%)                            | 12 (41.38%)                               |
| Depression with Psychosis                                             | 3 (3.66%)                              | 0 (0%)                                    |
| Mixed Anxiety and Depression                                          | 7 (8.54%)                              | 0 (0%)                                    |
| Eating Disorder                                                       | 2 (2.43%)                              | 4 (13.79%)                                |
| Postpartum Mood or Anxiety Disorder                                   | 3 (3.66%)                              | 0 (0%)                                    |
| Somatization Disorder                                                 | 1 (1.22%)                              | 0 (0%)                                    |
| Grief                                                                 | 2 (2.43%)                              | 1 (3.45%)                                 |

Integrated Care for Refugees

| Trauma and Stressor-Related Disorder                                                                                                                                                                                                                                                                                                                                                                                                                                                                                                                                                                                                                                                                                                                                                                     | 1 (1.22%) | 2 (6.90%) |
|----------------------------------------------------------------------------------------------------------------------------------------------------------------------------------------------------------------------------------------------------------------------------------------------------------------------------------------------------------------------------------------------------------------------------------------------------------------------------------------------------------------------------------------------------------------------------------------------------------------------------------------------------------------------------------------------------------------------------------------------------------------------------------------------------------|-----------|-----------|
| <p><i>Note.</i> MH = Mental Health. IFMC = International Family Medicine Clinic. FM = Family Medicine. Information reflects Family Medicine visits conducted between January 1, 2016, and December 31, 2021. MH follow-up visits were included if they took place between January 1, 2022, and May 17, 2022, the day when these data were pulled.</p> <p>We categorized countries of origin and exit according to the United Nation’s regional groupings framework to avoid cell sizes with fewer than 5 people. Patients spoke the following languages, listed in descending order of frequency: Dari and English (tied); Arabic and Nepali (tied); Pashto; Farsi; Urdu; and Burmese, Hindi, Karenni, Kiswahili, and Russian (tied). These measures were taken to preserve patient confidentiality.</p> |           |           |

## Integrated Care for Refugees

**Table S2**

Descriptive Characteristics of the 82 IFMC Patients Who Followed with Mental Health Care Providers

|                                                       | Seen Only by the<br>Family Stress Clinic | Seen Only by<br>Psychiatry | Seen by Both<br>Departments |
|-------------------------------------------------------|------------------------------------------|----------------------------|-----------------------------|
| Number of Patients Seen                               | 38                                       | 13                         | 31                          |
| Average Age in Years (SD)                             | 35.42 (13.49)                            | 44.69 (16.7)               | 36.45 (12.26)               |
| <i>Legal Sex</i>                                      |                                          |                            |                             |
| Female                                                | 27                                       | 9                          | 22                          |
| Male                                                  | 11                                       | 4                          | 9                           |
| <i>Region of Origin</i>                               |                                          |                            |                             |
| Central and Southern Asia                             | 24                                       | 12                         | 21                          |
| Eastern and South-Eastern Asia                        | <5                                       | 0                          | 0                           |
| Sub-Saharan Africa, Northern Africa, and Western Asia | 6                                        | <5                         | 6                           |
| Unknown                                               | 5                                        | 0                          | 4                           |
| <i>Region of Exit</i>                                 |                                          |                            |                             |
| Central and Southern Asia                             | 22                                       | 7                          | 14                          |
| Eastern and South-Eastern Asia                        | <5                                       | 0                          | 0                           |
| Sub-Saharan Africa, Northern Africa, and Western Asia | 6                                        | <5                         | 6                           |
| Unknown                                               | 5                                        | 2                          | 5                           |
| <i>Legal Status</i>                                   |                                          |                            |                             |
| Refugee                                               | 21                                       | 10                         | 25                          |
| Special Immigrant Visa                                | 14                                       | 2                          | 5                           |
| Not Provided                                          | 3                                        | 1                          | 1                           |
| Visit Information                                     |                                          |                            |                             |
| Number of Unique Visits                               | 111                                      | 109                        | 652                         |
| <i>Number of Visits per Patient</i>                   |                                          |                            |                             |
| Mean (SD)                                             | 2.92 (3.46)                              | 8.38 (7.47)                | 21.03 (14.13)               |

## Integrated Care for Refugees

|                                                   |    |    |     |
|---------------------------------------------------|----|----|-----|
| Median                                            | 2  | 6  | 18  |
| Minimum                                           | 1  | 1  | 3   |
| Maximum                                           | 20 | 21 | 56  |
| <i>Frequency of Different Visit Lengths</i>       |    |    |     |
| 10-20 minutes                                     | 2  | 0  | 3   |
| 30-40 minutes                                     | 55 | 0  | 52  |
| 45-50 minutes                                     | 0  | 52 | 181 |
| 60 minutes                                        | 54 | 49 | 383 |
| 90+ minutes                                       | 0  | 8  | 33  |
| <i>Primary Diagnosis Indicated by FM Referral</i> |    |    |     |
| Anxiety                                           | 14 | 2  | 4   |
| Depression                                        | 15 | 8  | 20  |
| Depression with Psychosis                         | 0  | 2  | 1   |
| Mixed Anxiety and Depression                      | 6  | 0  | 1   |
| Eating Disorder                                   | 0  | 1  | 1   |
| Postpartum Mood or Anxiety Disorder               | 1  | 0  | 2   |
| Somatization Disorder                             | 0  | 0  | 1   |
| Grief                                             | 1  | 0  | 1   |
| Trauma and Stressor-Related Disorder*             | 1  | 0  | 0   |

*Note.* IFMC = International Family Medicine Clinic. Of the 872 IFMC patient visits that occurred with a mental health provider between January 1, 2016, and May 17, 2022, 324 visits were completed by the Family Stress Clinic, 542 visits were completed by Psychiatry, and 6 visits could not be determined in which department they specifically occurred.

\*Upon follow-up with the Family Stress Clinic and/or Psychiatry, trauma and stressor-related disorders—which includes adjustment disorders and post-traumatic stress disorder—were indicated for 52 of the 82 patients seen.

We categorized countries of origin and exit according to the United Nation's regional groupings framework to avoid cell sizes with fewer than 5 people. Patients spoke the following languages, listed in descending order of frequency: Dari and English (tied);

## Integrated Care for Refugees

---

Nepali and Arabic (tied); Pashto; Farsi; Urdu; and Burmese, Hindi, Karenni, Kiswahili, and Russian (tied). These measures were taken to support patient confidentiality.
